# Supplementary material for: Depression and Diabetes Treatment Nonadherence: A Meta-Analysis
Source: Oxford University Press journal article supplement (doi:10.2337/dc08-1341), 2008-11-25
Supplement: dc081341-sup-online_only_appendix.doc [file dc081341-sup-online_only_appendix.doc]

| *First author, year (Design) | Sample Size Diabetes Type | Gender M/F Age‡ | Country & Ethnicity§ | Depression Assessment Method|| | Adherence Assessment Method | Type of Adherence Measured | Effect Size: ES r (95%CI) |
| --- | --- | --- | --- | --- | --- | --- | --- |
| Ando, 2005 (Longitudinal) | N = 35 Type 2 | Not reported Adults | Japan; A | Yatabe-Guilford Test | Hospital Records | Appointment Attendance | 0.46 (0.18 - 0.67) |
| Brody, 2008 (Cross-Sectional) | N = 200 Type 2 | Not reported Adults | U.S.; B | CES-D | Electronically downloaded glucometer readings | Glucose Monitoring | 0.23 (0.09 - 0.36) |
| Butler, 2007 (Cross-Sectional) | N = 78 Type 1 | 41 / 37 Youth | U.S.; W (99%) | CDI | Self-report | Composite | 0.32 (0.11 - 0.51) |
| Chao, 2005 (Cross-Sectional) | N = 445 Type 2 | 221 / 223 Adults | U.S.; W (78.2%) | PHQ-8 | Self-report | Medication | 0.21 (0.11 - 0.29) |
| Ciechanowski, 2003 (Cross-Sectional) | N = 475 Type 1 = 276 Type 2 = 199 | 261 / 214 Adults | U.S.; W (91%) | HSCL-90-R | Self-report | Diet, Exercise, Glucose Monitoring | 0.15 (0.06-0.25) |
| Ciechanowski, 2006 (Longitudinal) | N = 3923 Type 1 and Type 2 | 2015 / 1908 Adults | U.S.; W (80%) | PHQ-9 | Hospital Records | Appointment Attendance | 0.32 (0.29 - 0.34) |
| †Ciechanowski, 2000 (Cross-Sectional) | N = 359 Type 1 = 14 Type 2 = 345 | 158 / 201 Adults | U.S.; W (86%) | HSCL-90-R | Self-report Pharmacy Records | Diet, Exercise, Glucose Monitoring, Medication | 0.20 (0.06-0.32) |
| Clarke, 2005 (Cross-Sectional) | N = 99 Type 1 = 44 Type 2 = 55 | 50 / 49 Adults | New Zealand; A (46%), W (43%), O (10%) | Non-validated self-report inventory of depressive symptoms | Self-report | Composite | 0.51 (0.35 - 0.64) |
| Eaton,1992 (Cross-Sectional) | N = 127 Type 1 | 50 / 71 <1% Youth >99% Adults | U.S., Not reported | CES-D | Self-report of glucose monitoring and chart data for missed appointments and forgetting to bring blood sugar records to visits | Composite | 0.15 (-0.03 - 0.32) |
| Fisher, 2007 (Cross-Sectional) | N = 506 Type 2 | 218 / 288 Adults | U.S.; W (37%), B (21%), H (19%), A (17%), O (1%) | CIDI & CES-D | Self-report | Diet, Exercise | 0.11 (0.02 - 0.20) |
| †Garcia de Alba Garcia, 2006 (Cross-Sectional) | N = 796 Type 2 | 307 / 489 Adults | Mexico; H | Zung (in Spanish) | Self-report | Diet, Exercise, Glucose Monitoring | 0.11 (0.02 - 0.21) |
| †Gonzalez, in press (Longitudinal) | N = 208 Type 2 | 106 / 102 Adults | U.S.; W (86%) | HANDS | Self-report | Diet, Exercise, Glucose Monitoring, Medication | 0.20 (0.07 - 0.33) |
| Grey, 1991 (Cross-Sectional) | N = 103 Type 1 | 49 / 54 Youth | U.S.; W (62%), B (10%), H or A (28%) | CDI | Self-report | Composite | 0.07 (-0.13 - 0.26) |
| Herpertz, 2001 (Longitudinal) | N = 36 Type 1 = 13 Type 2 = 23 | 10 / 26 Adults | Germany; Not reported | BDI | Interview to assess deliberate insulin omission | Medication | 0.30 (-0.22 - 0.69) |
| Hill-Briggs, 2005 (Cross-Sectional) | N = 181 Type 2 | 44 / 137 Adults | U.S.; B | CES-D | Self-report | Medication | 0.14 (-0.01 - 0.28) |
| Hood, 2006 (Cross-Sectional) | N = 145 Type 1 | 64 / 81 Youth | U.S.; Not reported | CDI | Electronically downloaded data supplemented by parent report | Glucose Monitoring | 0.21 (0.04 - 0.38) |
| Kilbourne, 2005 (Longitudinal) | N = 203 Type 2 | 203 / 0 Adults | U.S.; W (83%) | PHQ-9 | Self-report | Medication | 0.16 (0.01 - 0.30) |
| Korbel, 2007 (Cross-Sectional) | N = 127 Type 1 | 65 / 62 Youth | U.S.; W (97%) | CDI | Self-report | Composite | 0.44 (0.29 - 0.57) |
| Kovacs, 1996 (Longitudinal) | N = 88 Type 1 | 42 / 46 Youth | U.S.; W (94%), B (6%) | ISCA | Interview | Composite | 0.23 (0.02 - 0.42) |
| Kuo, 2003 (Longitudinal) | N = 908 | 372 / 536 Adults | U.S.; H | CES-D - *depressed vs. not depressed* | Interview | Medication | 0.02 (-0.04 - 0.09) |
| Kuttner, 1990 (Cross-Sectional) | N = 50 Type 1 | 20 / 30 Youth | U.S.; W (92%) | CDI | Interview | Composite | 0.14 (-0.15 - 0.40) |
| Lerman, 2004 (Cross-Sectional) | N = 176 Type 2 | 64 / 112 Adults | Mexico; H | One question regarding mood | Self-report | Composite | 0.23 (0.04 - 0.41) |
| †Lin, 2004 (Cross-Sectional) | N = 4463 Type 1 = 196 Type 2 = 4267 | Not Reported Adults | U.S.; W (88%), A (6%), B (4%), H (3%) | PHQ-9 | Self-report Pharmacy Refill Data | Diet, Exercise, Glucose Monitoring, Medication | 0.07 (0.03 - 0.11) |
| Littlefield, 1992 (Cross-Sectional) | N = 193 Type 1 | 90 / 103 Youth | Canada; Not reported | CDI | Self-report | Composite | 0.50 (0.39 - 0.60) |
| Lustman, 2005 (Cross-Sectional) | N = 188 Type 1 | 50 / 50 Adults | U.S.; W (96%) | SCL-90 | Self-report | Composite | 0.26 (0.12 - 0.39) |
| McCaul, 1987 (Cross-Sectional) | N = 107 Type 1 | 50 / 57 21% Youth 79% Adults | U.S.; W (100%) | ATQ | Self-monitoring records, self-report, 24-hour dietary recall, activity monitor | Diet, Exercise, Glucose Monitoring, Medication | Adolescents = 0.43 (0.02-0.72); Adults = 0.07 (-0.14-0.28) |
| †McKellar, 2004 (Longitudinal) | N = 307 Type 2 | 219 / 88 Adults | U.S.; W (45%), H (31%), B (12%), O (12%) | CES-D | Self-report | Diet, Composite, Medication | 0.28 (0.17 - 0.38) |
| Murata, 2004 (Cross-Sectional) | N = 347 Type 2 | 333 / 14 Adults | U.S.; W (66.9%) | GDS | Self-report | Diet | 0.14 (-0.02 - 0.30) |
| Naar-King, 2006 (Cross-Sectional) | N = 119 Type 1 | 61 / 58 Youth | U.S.; B (61%), W (26%), H, A, or O (13%) | BASC | Self-report | Composite | 0.23 (0.05 - 0.39) |
| Nau, 2007 (Cross-Sectional) | N = 391 Type 2 | 195 / 196 Adults | U.S.; W (78.3%) | PHQ-8 | Self-report | Medication | Men = 0.25 (0.12 - 0.37); Women = 0.05 (-0.09 - 0.18) |
| Padgett, 1993 (Cross-Sectional) | N = 180 Type 2 = 147 Type 1 = 33 | 88 / 92 Adults | Croatia; Not reported | Zung (translated into Croatian) | Self-report | Composite | 0.21 (0.07 – 0.35) |
| Park, 2004 (Cross-sectional) | N = 168 Type 2 | 101 / 67 Adults | Republic of Korea; Not reported | CES-D | Self-report | Diet, Exercise , Glucose Monitoring, Medication | 0.13 (-0.03 – 0.28) |
| Ponzo, 2006 (Cross-Sectional) | N = 50 Type 2 | 25 / 25 Adults | Canada; 100% Italian Heritage | CES-D | Self-report | Diet | 0.02 (-0.26 – 0.30) |
| Sacco, 2007 (Cross-Sectional) | N = 99 Type 2 | 46 / 53 Adults | U.S.; W (78%), B (13%), H (8%), A (1%) | PHQ-9 | Self-report | Composite | 0.38 (0.20 – 0.54) |
| Storch, 2006 (Cross-Sectional) | N = 167 Type 1 | 60 / 107 Youth | U.S.; W (80.2%), B (13.8%), H (2.6%), O (2.4%) | CDI-S | Interview | Composite | 0.24 (0.09 – 0.38) |
| Surridge, 1984 (Cross-Sectional) | N = 50 Type 1 | 27 / 23 Adults | Canada; Not reported | HRSD | Hospital records, unstructured dietitian reports, self-reports, and spouse or relative reports | Appointment Attendance, Diet, Frequency of Exercise, Frequency of Urine Tests, Self-management when, Distressed | 0.31 (0.03 - 0.54) |
| Tellez-Zenteno, 2002 (Cross-Sectional) | N = 189 Type 2 | 80 / 109 Adults | Mexico ; Not Reported | BDI | Interview | Composite, Diet, Exercise | 0.26 (0.12 - 0.39) |
| Van Tilburg, 2001 (Cross-Sectional) | N = 30 Type 1 | 21 / 9 Adults | U.S.; W (93%), B (7%) | BDI | Interview | Glucose Monitoring | 0.32 (-0.05 - 0.61) |
| Wearden, 2006 (Cross-Sectional) | N = 62 Type 1 | 31 / 31 Adults | United Kingdom; Not reported | HAD | Interview | Composite | 0.18 (-0.08 - 0.41) |
| Weijman, 2005 (Cross-Sectional) | N = 292 Type 1 = 159 Type 2 = 133 | 195 / 97 Adults | Netherlands; Not Reported | CES-D | Self-report | Diet, Glucose monitoring, Medication | Type 1 = 0.01 (-0.15 - 0.16); Type 2 = 0.10 (-0.07 - 0.27) |
| Weinger, 2005 (Cross-Sectional) | N = 407 Type 1 = 248 Type 2 = 159 | 175 / 232 Adults | U.S.; W (88%) | SCL-90 | Self-report | Composite | Type 1 = 0.21 (0.09 – 0.33); Type 2 = 0.29 (0.14 – 0.43) |
| Weinger, 2005 (Longitudinal) | N = 134 Type 1 = 84 Type 2 = 50 | 54 / 80 Adults | U.S.; Not reported | BSI | Hospital Record Data | Appointment Attendance | 0.29 (0.14 - 0.43) |
| Wilson, 1986 (Cross-Sectional) | N = 184 Type 2 | 61 / 123 Adults | U.S.; W (97.8%) | BDI and CES-D (averaged) | Self-report | Diet, Exercise, Glucose Monitoring, Medication | 0.15 (-0.02 - 0.32) |

* - See below for a list of complete references for all publications included in the meta-analysis

† - Some data that was not included in the original publication was obtained from the author(s)

‡ - (M) -- Male, (F) -- Female

§ - (A) -- Asian or Pacific Islander, (B) -- African American, (H) – Hispanic, (W) -- Non-Hispanic Caucasian / White, (O) – Other

|| - *CES-D* – Centers for Epidemiologic Studies Depression Scale, *CDI* – Children’s Depression Inventory, *PHQ* -- Patient Health Questionnaire, *HSCL (i.e., SCL)* -- Hopkins Symptom Checklist (*R* – revised), *CIDI* -- Composite International Diagnostic Interview, *Zung* – Zung Self-report Depression Scale, *HANDS* -- Harvard National Depression Screening Scale, *BDI* – Beck Depression Inventory, *ISCA* -- Interview Schedule for Children and Adolescents, *ATQ* – Automatic Thoughts Questionnaire, *GDS* – Geriatric Depression Scale, *BASC* – Behavior Assessment System for Children, *CDI-S* – Children’s Depression Inventory- Short form, *HRSD* –Hamilton Rating Scale for Depression, *HAD* – Hospital Anxiety and Depression, *BSI* – Beck Symptom Inventory

1. Ando M, Ando S, Takeuchi T: Preliminary study of psychological factors affecting clinic attendance and glycemic control of Japanese patients with type 2 diabetes mellitus. *Psychol Rep* 96: 129-132, 2005
2. Brody GH, Kogan SM, McBride Murry V, Chen Y, Brown AC: Psychological functioning, support for self-management, and glycemic control among rural African Americans adults with diabetes mellitus type 2. *Health Psychol* 27: S83-S90, 2008
3. Butler JM, Skinner M, Gelfand D, Berg CA, Wieber DJ: Maternal parenting style and adjustment in adolescents with type 1 diabetes. *J Pediatr Psychol* 32: 1227-1237, 2007
4. Chao J, Nau DP, Aikens JE, Taylor SD: The mediating role of health beliefs in the relationship between depressive symptoms and medication adherence in persons with diabetes. *Res Social Adm Pharm* 1: 508-525, 2005
5. Ciechanowski PS, Katon WJ, Russo JE: Where is the patient? The association of psychosocial factors and missed primary care appointments in patients with diabetes. *Gen Hosp Psychiatry* 28: 9-17, 2006
6. Ciechanowski PS, Katon WJ, Russo JE, Hirsch, IB: The relationship of depressive symptoms to symptom reporting, self-care and glucose control in diabetes. *Gen Hosp Psychiatry* 25: 246-252, 2003
7. Ciechanowski PS, Katon WJ, Russo JE: Depression and diabetes: impact of depressive symptoms on adherence, function, and costs. *Arch Intern Med* 160: 3278-3285, 2000
8. Clarke D, Goosen T: Depression and compliance with treatment in a sample of Northland diabetes patients. *N Z Med J* 118: 1-10, 2005
9. Eaton WW, Mengel M, Mengel L, Larson D, Campbell R, Montague RB: Psychosocial and psychopathologic influences on management and control of insulin-dependent diabetes. *Int J Psychiatry Med* 22: 105-117, 1992
10. Fisher L, Skaff MM, Mullan JT, Arean P, Mohr D, Masharani U, Glasgow R, Laurencin G: Clinical depression versus distress among patients with type 2 diabetes: not just a question of semantics. *Diabetes Care* 30: 542-548, 2007
11. Garcia de Alba Garcia JE, Dallo FJ, Salcedo Rocha AL, Colunga Rodriguez C, Perez N, Baer RD, Weller SC: The relative effect of self-management practices on glycaemic control in type 2 diabetic patients in Mexico. *Chronic Illn* 2: 77-85, 2006
12. Gonzalez JS, Safren SA, Delahanty LM, Cagliero E, Wexler DJ, Meigs JB, Grant RW: Symptoms of depression prospectively predict poorer self-care in patients with type 2 diabetes. *Diabet Med*, in press DOI: 10.1111/j.1464-5491.2008.02535.x
13. Grey M, Cameron ME, Thurber FW: Coping and adaptation in children with diabetes. *Nursing Research* 40: 144-149, 1991
14. Herpertz S, Albus C, Kielmann R, Hagemann-Patt H, Lichtblau K, Kohle K, Mann K, Senf W: Comorbidity of diabetes mellitus and eating disorders: a follow-up study. *J Psychosom Res* 51: 673-678, 2001
15. Hill-Briggs F, Gary TL, Bone LR, Hill MN, Levine DM, Brancati FL: Medication adherence and diabetes control in urban African Americans with type 2 diabetes. *Health Psychol* 24: 349-357, 2005
16. Hood KK, Huestis S, Maher A, Butler D, Volkening L, Laffel LMB: Depressive symptoms in children and adolescents with type 1 diabetes. *Diabetes Care* 29: 1389-1391, 2006
17. Kilbourne AM, Reynolds CF, Good CB, Sereika SM., Justice AC, Fine MJ: How does depression influence diabetes medication adherence in older patients? *Am J Geriatr Psychiatry* 13: 202-210, 2005
18. Korbel CD, Wiebe DJ, Berg CA, Palmer DL: Gender differences in adherence to type 1 diabetes management across adolescence: the mediating role of depression. *Children’s Healthcare* 36: 83-89, 2007
19. Kovacs M, Mukerji P, Iyengar S, Drash A: Psychiatric disorder and metabolic control among youths with IDDM: a longitudinal study. *Diabetes Care* 19: 318-323, 1996
20. Kuo Y, Raji MA, Markides KS, Ray LA, Espino DV, Goodwin JS: Inconsistent use of diabetes medications, diabetes complications, and mortality in older Mexican Americans over a 7-year period. *Diabetes Care* 26: 3054-3060, 2003
21. Kuttner MJ, Delamater AM, Santiago JV: Learned helplessness in diabetic youths. *J Pediatr Psychol* 15: 581-594, 1990
22. Lerman I, Lozano L, Villa AR, Hernandez-Jimenez S, Weinger K, Caballero AE, Salinas CA, Velasco ML, Gomez-Perez FJ, Rull JA: Psychosocial factors associated with poor diabetes self-care management in a specialized center in Mexico City. *Biomedicine and Pharmacotherapy* 58: 566-570, 2004
23. Lin EH, Katon W, Von Korff M, Rutter C, Simon GE, Oliver M, Ciechanowski P, Ludman EJ, Bush T, Young B: Relationship of depression and diabetes self-care, medication adherence, and preventative care. *Diabetes Care* 27: 2154-2160, 2004
24. Littlefield CH, Craven JL, Rodin GM, Daneman D, Murray MA, Rydall AC: Relationship of self-efficacy and bingeing to adherence to diabetes regimen among adolescents. *Diabetes Care* 15: 90-94, 1992
25. Lustman PJ, Clouse RE, Ciechanowski PS, Hirsch IB, Freedland KE: Depression-related hyperglycemia in type 1 diabetes: a mediational approach. *Psychosom Med* 67: 195-199, 2005
26. McCaul KD, Glasgow RE, Schafer LC: Diabetes regimen behaviors: predicting adherence. *Med Care* 25: 868-881, 1987
27. McKellar JD, Humphreys K, Piette JD. Depression increases diabetes symptoms by complicating patients’ self-care adherence. *Diabetes Educ* 30: 485-492, 2004
28. Murata GH, Shah JH, Duckworth WC, Wendel CS, Mohler MJ, Hoffman RM: Food frequency questionnaire results correlate with metabolic control in insulin-treated veterans with type 2 diabetes: The diabetes outcomes in veterans study. *J Am Diet Assoc* 104: 1816-1826, 2004
29. Naar-King S, Idalski A, Ellis D, Frey M, Templin T, Cunningham PB, Cakan N: Gender differences in adherence and metabolic control in urban youth with poorly controlled type 1 diabetes: the mediating role of mental health symptoms. *J Pediatr Psychol* 31: 793-802, 2006
30. Nau DP, Aikens JE, Pacholski AM: Effects of gender and depression on oral medication adherence in persons with type 2 diabetes mellitus. *Gend Med* 4: 205-213, 2007
31. Padgett DK: Sociodemographic and disease-related correlates of depressive morbidity among diabetic patients in Zagreb, Croatia. *J Nerv Ment Dis* 181: 123-129, 1993
32. Park H, Hong Y, Lee H, Ha E, Sung Y: Individuals with type 2 diabetes and depressive symptoms exhibited lower adherence with self-care. *J Clin Epidemiology* 57: 978-984, 2004
33. Ponzo MG, Gucciardi E, Weiland M, Masi R, Lee R, Grace SL: Barriers to diabetes self-management in Italian women and men with type 2 diabetes. *Behav Med* 31: 153-160, 2006
34. Sacco WP, Wells KJ, Friedman A, Matthew R, Perez S, Vaughan CA: Adherence, body mass index, and depression in adults with type 2 diabetes: the mediational role of diabetes symptoms and self-efficacy. *Health Psychol* 26: 693-700, 2007
35. Storch EA, Hedgerken AD, Gefken GR, Lewin AB, Ohleyer V, Freddo M, Silverstein JH: Bullying, regimen, self-management, and metabolic control in youth with type 1 diabetes. *J Pediatr* 148: 784-787, 2006
36. Surridge DHC, Williams Erdahl DL, Lawson JS, Donald MW, Monga TN, Bird CE, Letemendia FJJ: Psychiatric aspects of diabetes mellitus. *Br J Psychiatry* 145: 269-276, 1984
37. Tellez-Zenteno JF, Cardiel MH: Risk factors associate with depression in patients with type 2 diabetes mellitus. *Arch Med Res* 33: 53-60, 2002
38. Van Tilburg MAL, McCaskill CC, Lane JD, Edwards CL, Bethel A, Feinglos MN, Surwit RS: Depressed mood is a factor in glycemic control in type 1 diabetes. *Psychosom Med* 63: 551-555, 2001
39. Wearden AJ, Hynd K, Smith H, Davies R, Tarrier N: Poorer self-management and glycemic control in adult patients with long-standing type 1 diabetes. *Diabetes Care* 29: 1208-1213, 2006
40. Weijman I, Ros WJG, Rutten GEHM, Schaufeli WB, Schabracq MJ, Winnubst JAM: Frequency and perceived burden of diabetes self-management activities in employees with insulin-treated diabetes: relationships with health outcomes. *Diabetes Res Clin Pract* 68: 56-64, 2005
41. Weinger K, Butler HA, Welch GW, La Greca AM: Measuring diabetes self-care: a psychometric analysis of the self-care inventory-revised with adults. *Diabetes Care* 28: 1346-1352, 2005
42. Weinger K, McMurrich SJ, Yi JP, Lin S, Rodriguez M: Psychological characteristics of frequent short-notice cancellers of diabetes medical and educational appointments. *Diabetes Care* 28: 1791-1793, 2005
43. Wilson W, Ary DV, Biglan A, Glasgow RE, Toobert DJ, Campbell DR: Psychosocial predictors of self-care behaviors (compliance) and glycemic control in non-insulin-dependent diabetes mellitus. *Diabetes Care* 9: 614-622, 1986
